# Supplementary material for: Mass Spectrometry–Based Proteomics Analysis of Human Substantia Nigra From Parkinson's Disease Patients Identifies Multiple Pathways Potentially Involved in the Disease
Source: PubMed Central journal article supplement (PMC9792365; doi:10.1016/j.mcpro.2022.100452), 2022-11-22

# Supplemental Figure S1

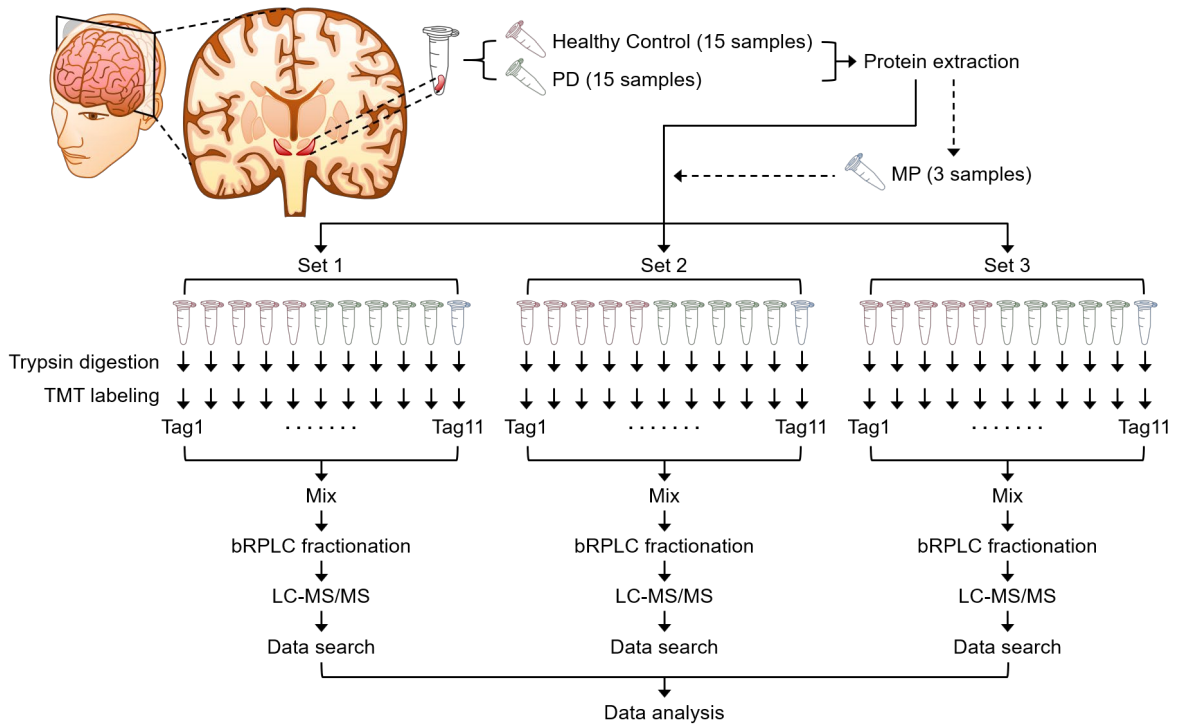

# Supplemental Figure S2

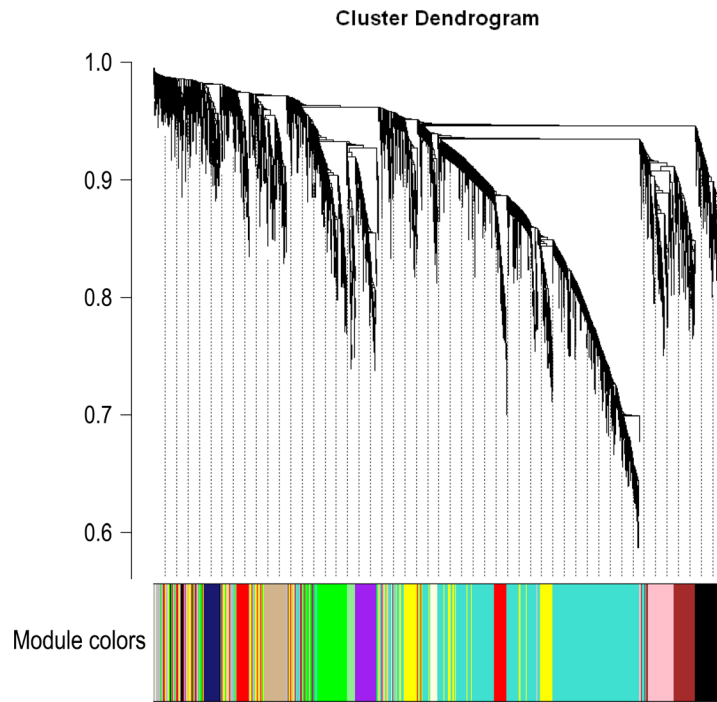

(A)

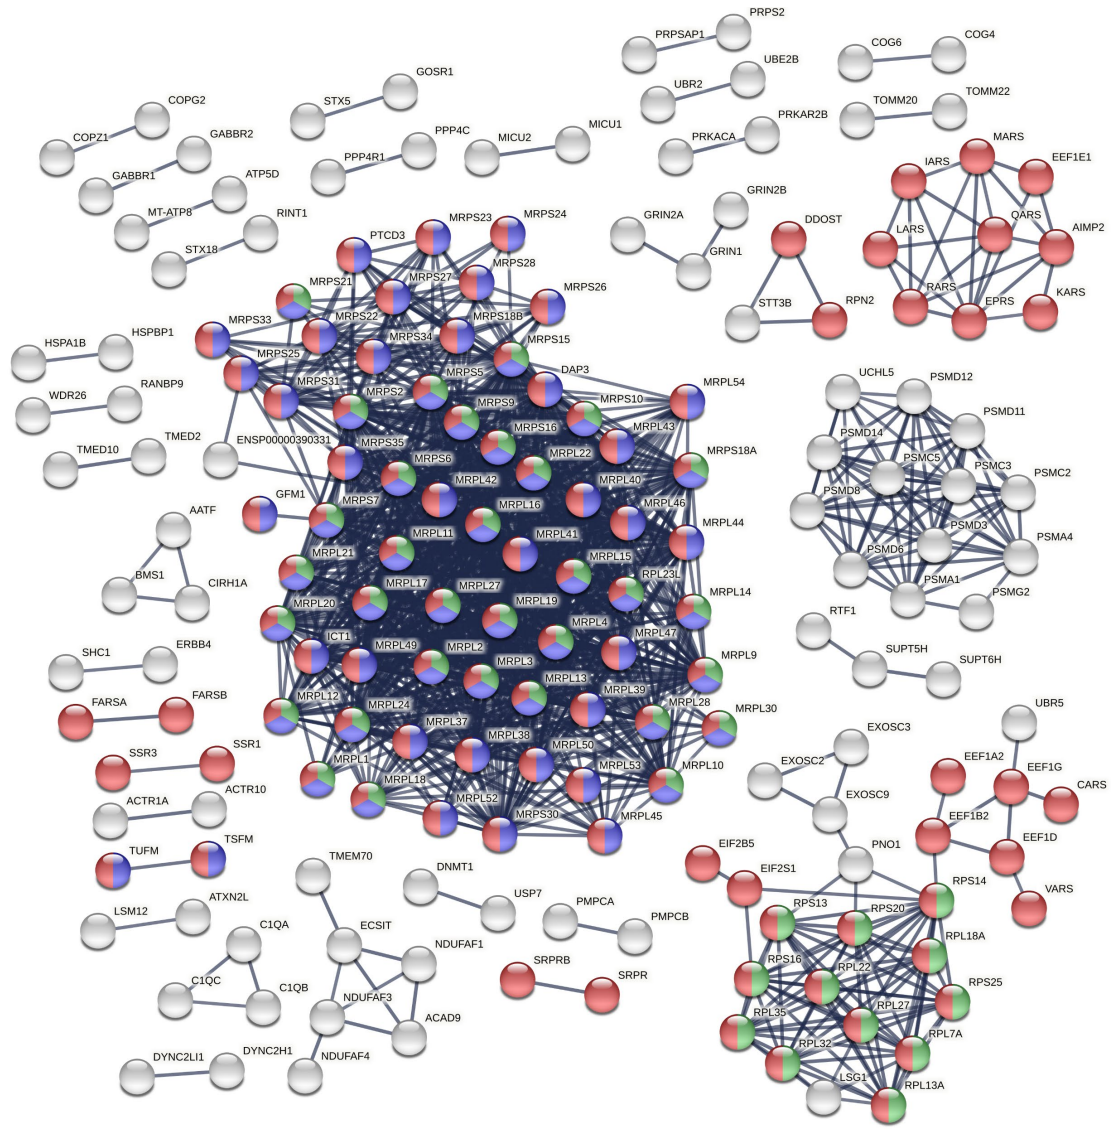

(B)

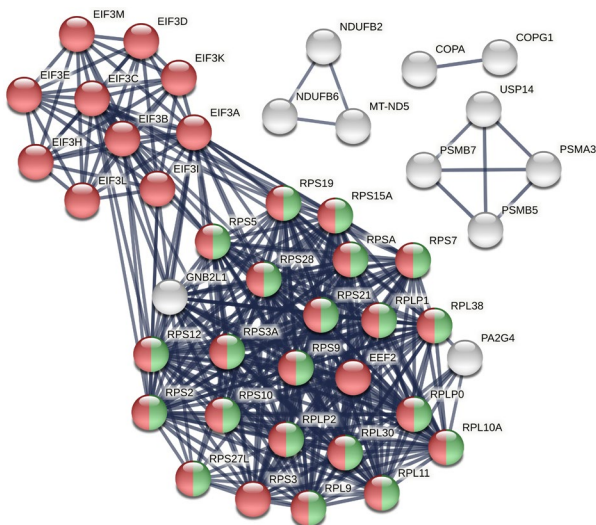

# Supplemental Figure S4

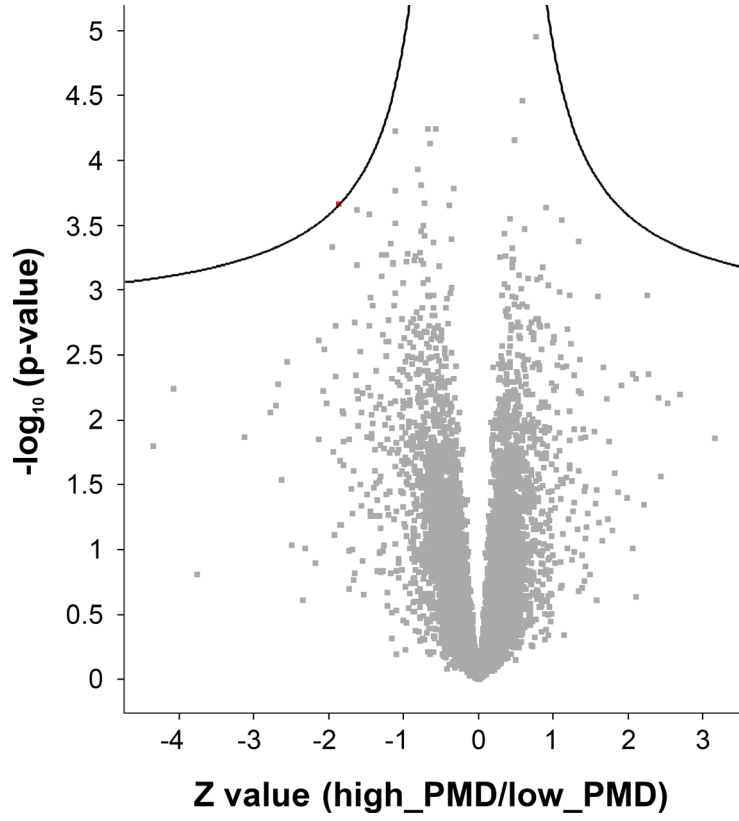

# Supplemental Figure S5

(A)

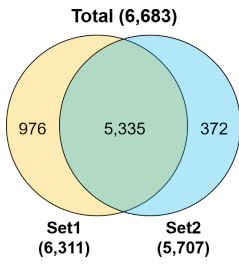

(B)

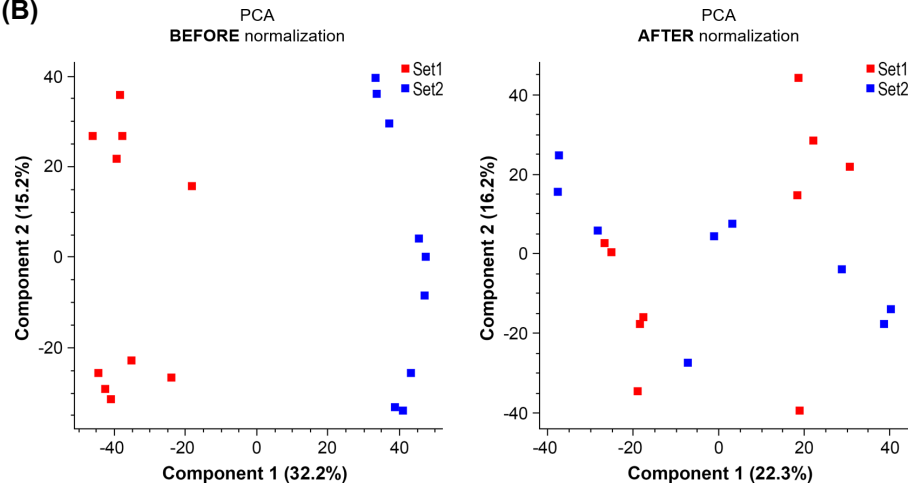

# Supplemental Figure S6

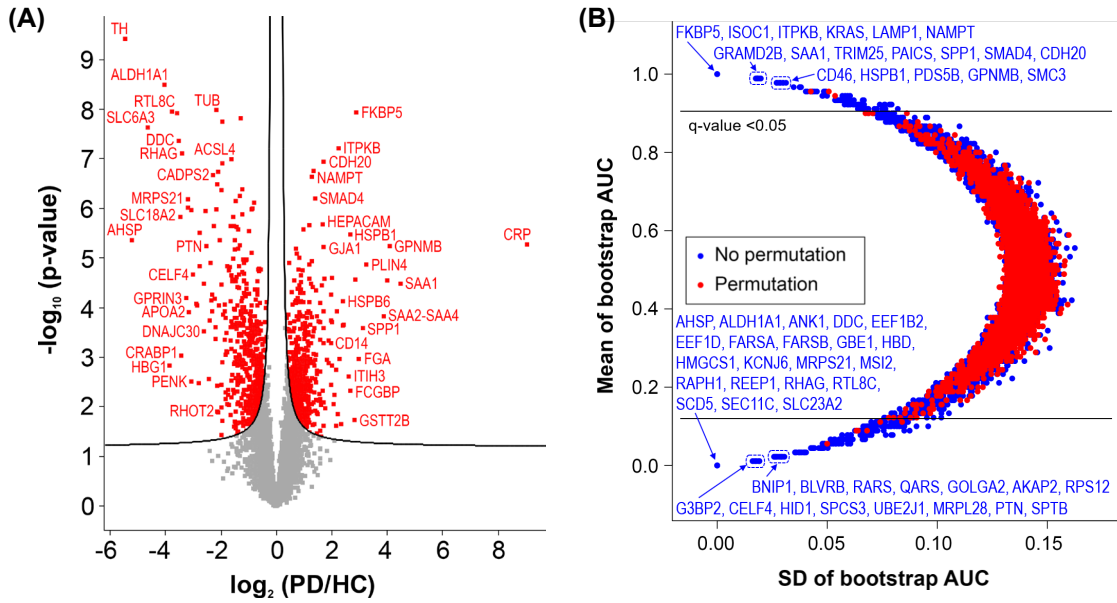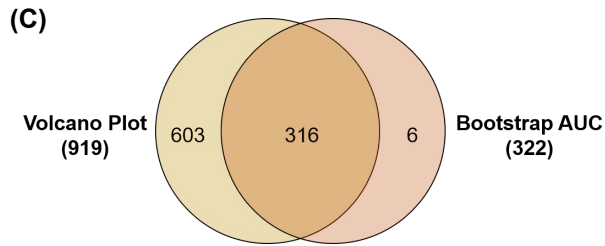

# Supplemental Figure S7

## Ribosomal RNAs

|                                  |     |    |      |     |
|----------------------------------|-----|----|------|-----|
| Bacteria / Archaea<br>Eukaryotes | 23S | 5S |      | 16S |
|                                  | 25S | 5S | 5.8S | 18S |

## Ribosomal proteins

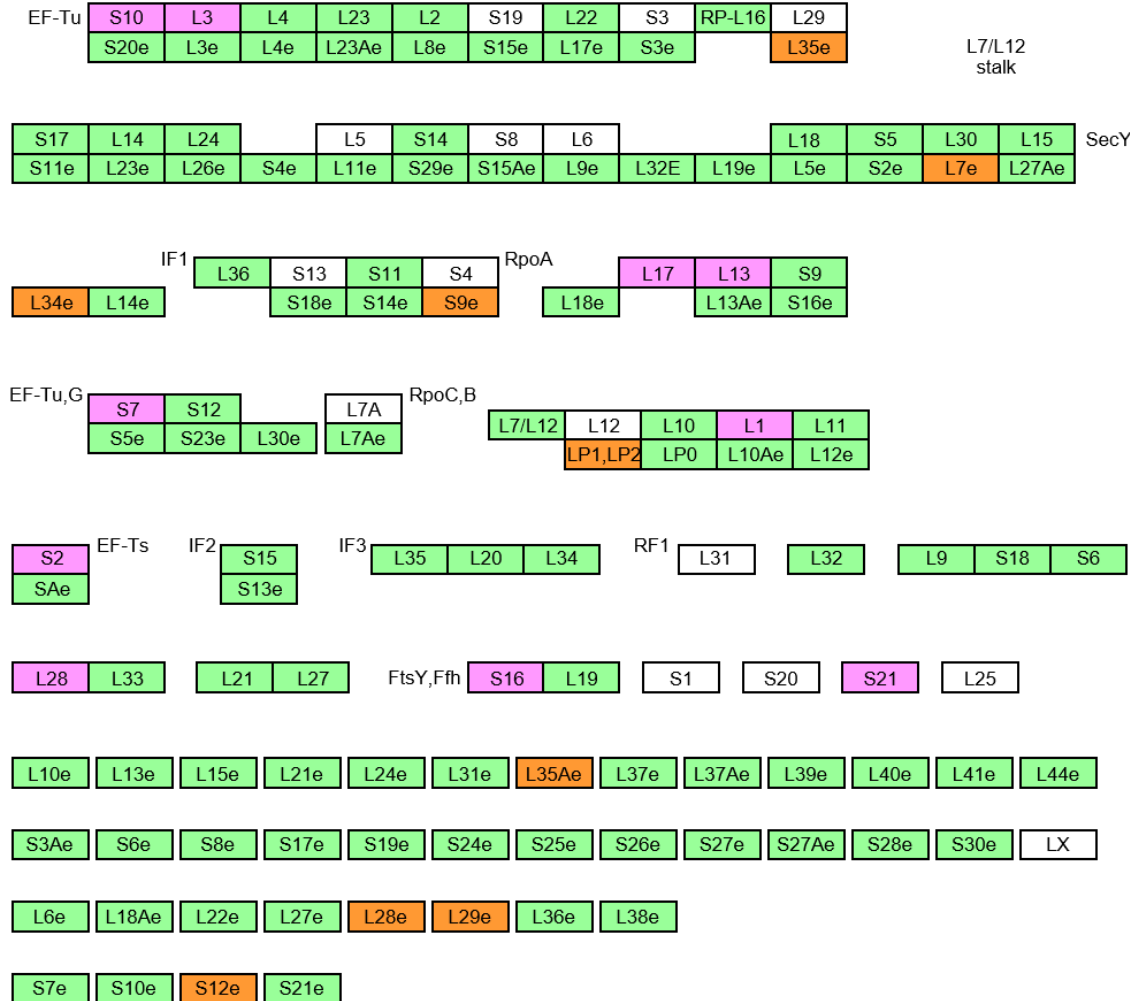

# Supplemental Figure S8

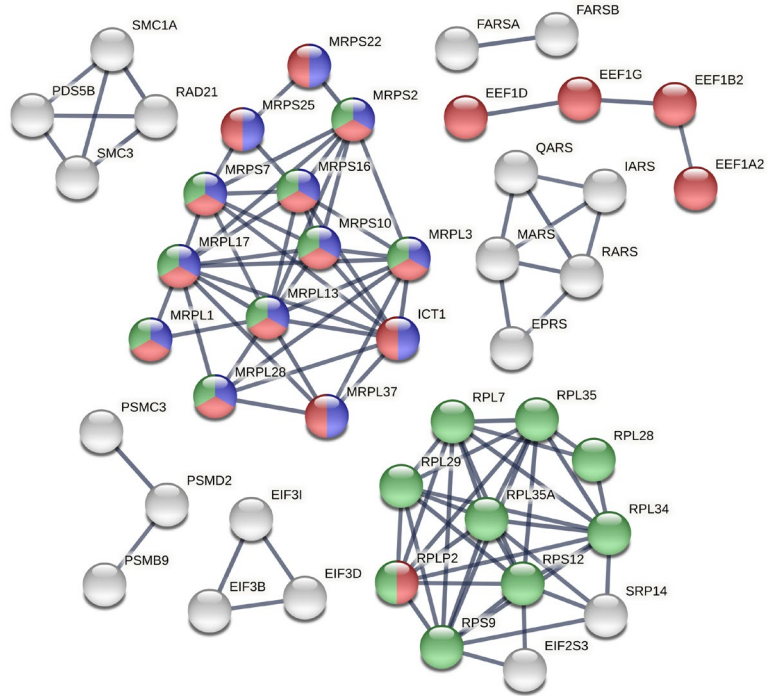

Supplement: mmc8.pdf [file mmc8.pdf]
